# Supplementary material for: Accumulation of STR-Loci Aberrations in Subclones of Jurkat Cell Line as a Model of Tumor Clonal Evolution
Source: MDPI journal article supplement (doi:10.3390/genes14030571), 2023-02-24
Supplement: s1 [file s1]

**Table S4.** The distribution of Jurkat-B4 subclones between STR profiles according to growth rate (rapid, medium, slow).

| STR-profile     | rapid<br>growing<br>clones, n | medium<br>growing<br>clones, n | slow<br>growing<br>clones, n | sum | percentage |
|-----------------|-------------------------------|--------------------------------|------------------------------|-----|------------|
| N               | 42                            | 38                             | 28                           | 108 | 60,0%      |
| 12p EM          | 0                             | 0                              | 11                           | 11  | 6,1%       |
| 12p LOH         | 0                             | 2                              | 7                            | 9   | 5,0%       |
| 6q EM           | 6                             | 2                              | 1                            | 9   | 5,0%       |
| vWA EM          | 0                             | 4                              | 1                            | 5   | 2,8%       |
| 16q EM          | 2                             | 1                              | 0                            | 3   | 1,7%       |
| 22q EM          | 3                             | 0                              | 0                            | 3   | 1,7%       |
| 10q EM          | 0                             | 1                              | 1                            | 2   | 1,1%       |
| 5q EM           | 0                             | 1                              | 1                            | 2   | 1,1%       |
| 12+6 EM         | 0                             | 0                              | 2                            | 2   | 1,1%       |
| 8q LOH          | 0                             | 1                              | 1                            | 2   | 1,1%       |
| 1,2,12,21,Y LOH | 0                             | 2                              | 0                            | 2   | 1,1%       |
| 10q LOH 12p EM  | 0                             | 0                              | 2                            | 2   | 1,1%       |
| 1q Y LOH        | 2                             | 0                              | 0                            | 2   | 1,1%       |
| 21q EM          | 1                             | 0                              | 0                            | 1   | 0,6%       |
| FGA EM          | 1                             | 0                              | 0                            | 1   | 0,6%       |
| 10+6 EM         | 1                             | 0                              | 0                            | 1   | 0,6%       |
| 2+6 EM          | 1                             | 0                              | 0                            | 1   | 0,6%       |
| 5+5 EM          | 0                             | 1                              | 0                            | 1   | 0,6%       |
| 7+18 EM         | 0                             | 1                              | 0                            | 1   | 0,6%       |
| 12+4 EM         | 0                             | 1                              | 0                            | 1   | 0,6%       |
| 12+22 EM        | 0                             | 0                              | 1                            | 1   | 0,6%       |
| 12+4+6 EM       | 0                             | 0                              | 1                            | 1   | 0,6%       |
| 2p LOH          | 0                             | 1                              | 0                            | 1   | 0,6%       |
| 10q LOH         | 0                             | 1                              | 0                            | 1   | 0,6%       |
| 22q LOH         | 1                             | 0                              | 0                            | 1   | 0,6%       |
| 5q LOH          | 0                             | 1                              | 0                            | 1   | 0,6%       |
| 22q LOH 12p EM  | 0                             | 0                              | 1                            | 1   | 0,6%       |
| 4q LOH 12pEM    | 0                             | 0                              | 1                            | 1   | 0,6%       |
| 4q LOH vWA EM   | 0                             | 0                              | 1                            | 1   | 0,6%       |
| 2p LOH 5q6q EM  | 0                             | 1                              | 0                            | 1   | 0,6%       |
| 10q5q LOH       | 0                             | 1                              | 0                            | 1   | 0,6%       |
