# Supplementary material for: Accumulation of STR-Loci Aberrations in Subclones of Jurkat Cell Line as a Model of Tumor Clonal Evolution
Source: MDPI journal article supplement (doi:10.3390/genes14030571), 2023-02-24
Supplement: s1 [file s1]

**Table S5.** The distribution of Jurkat-O1 subclones between STR profiles according to growth rate (rapid, medium, slow).

| STR-profile           | rapid<br>growing<br>clones, n | medium<br>growing<br>clones, n | slow<br>growing<br>clones, n | sum | percentage |
|-----------------------|-------------------------------|--------------------------------|------------------------------|-----|------------|
| N                     | 86                            | 83                             | 76                           | 245 | 64,3%      |
| 1q EM                 | 3                             | 5                              | 5                            | 13  | 3,4%       |
| CSFPO 5q LOH          | 3                             | 5                              | 3                            | 11  | 2,9%       |
| 8q EM                 | 3                             | 3                              | 3                            | 9   | 2,4%       |
| 10q EM                | 3                             | 3                              | 3                            | 9   | 2,4%       |
| 6q EM                 | 2                             | 3                              | 3                            | 8   | 2,1%       |
| 22q EM                | 7                             | 1                              | 0                            | 8   | 2,1%       |
| vWA EM                | 2                             | 1                              | 3                            | 6   | 1,6%       |
| FGA EM                | 2                             | 1                              | 3                            | 6   | 1,6%       |
| 12p EM                | 2                             | 4                              | 0                            | 6   | 1,6%       |
| 10q LOH               | 2                             | 0                              | 4                            | 6   | 1,6%       |
| 21q EM                | 3                             | 2                              | 0                            | 5   | 1,3%       |
| 16q EM                | 0                             | 3                              | 1                            | 4   | 1,0%       |
| 7q EM                 | 0                             | 2                              | 1                            | 3   | 0,8%       |
| 2 7 16 TPOX vWA<br>EM | 0                             | 0                              | 3                            | 3   | 0,8%       |
| 1q LOH                | 1                             | 0                              | 2                            | 3   | 0,8%       |
| 1q LOH 6q EM          | 1                             | 1                              | 1                            | 3   | 0,8%       |
| CSF 5q EM             | 2                             | 0                              | 0                            | 2   | 0,5%       |
| 4q LOH                | 0                             | 1                              | 1                            | 2   | 0,5%       |
| 22q LOH               | 0                             | 0                              | 2                            | 2   | 0,5%       |
| 18q EM                | 1                             | 1                              | 0                            | 2   | 0,5%       |
| 16 11 2 Y EM          | 0                             | 0                              | 1                            | 1   | 0,3%       |
| TPOH EM               | 0                             | 1                              | 0                            | 1   | 0,3%       |
| CSF 5q LOH 8q<br>EM   | 0                             | 1                              | 0                            | 1   | 0,3%       |
| CSF 5q LOH 22q<br>EM  | 0                             | 0                              | 1                            | 1   | 0,3%       |
| 8q vWA EM             | 0                             | 0                              | 1                            | 1   | 0,3%       |
| 8 16 18 22 EM         | 1                             | 0                              | 0                            | 1   | 0,3%       |
| 7q LOH 6q EM          | 0                             | 0                              | 1                            | 1   | 0,3%       |
| 2p LOH                | 0                             | 0                              | 1                            | 1   | 0,3%       |
| 2p EM                 | 0                             | 0                              | 1                            | 1   | 0,3%       |
| 21q vWA EM            | 0                             | 1                              | 0                            | 1   | 0,3%       |
| 21q 6q EM             | 0                             | 1                              | 0                            | 1   | 0,3%       |

|                                 |          |          |          |          |             |
|---------------------------------|----------|----------|----------|----------|-------------|
| <b>2 7 11 TPOX vWA<br/>Y EM</b> | <b>0</b> | <b>0</b> | <b>1</b> | <b>1</b> | <b>0,3%</b> |
| <b>1q LOH CSF 5q 6q<br/>EM</b>  | <b>0</b> | <b>0</b> | <b>1</b> | <b>1</b> | <b>0,3%</b> |
| <b>1q LOH 6q EM</b>             | <b>0</b> | <b>0</b> | <b>1</b> | <b>1</b> | <b>0,3%</b> |
| <b>1q 21q EM</b>                | <b>1</b> | <b>0</b> | <b>0</b> | <b>1</b> | <b>0,3%</b> |
| <b>13q TPOX EM</b>              | <b>0</b> | <b>0</b> | <b>1</b> | <b>1</b> | <b>0,3%</b> |
| <b>13q 18q EM</b>               | <b>0</b> | <b>1</b> | <b>0</b> | <b>1</b> | <b>0,3%</b> |
| <b>13q 16q EM</b>               | <b>0</b> | <b>1</b> | <b>0</b> | <b>1</b> | <b>0,3%</b> |
| <b>12p 6q EM</b>                | <b>1</b> | <b>0</b> | <b>0</b> | <b>1</b> | <b>0,3%</b> |
| <b>12p 4q EM</b>                | <b>0</b> | <b>0</b> | <b>1</b> | <b>1</b> | <b>0,3%</b> |
| <b>11p Y EM</b>                 | <b>0</b> | <b>0</b> | <b>1</b> | <b>1</b> | <b>0,3%</b> |
| <b>10q vWA EM</b>               | <b>1</b> | <b>0</b> | <b>0</b> | <b>1</b> | <b>0,3%</b> |
| <b>10q LOH 8q EM</b>            | <b>0</b> | <b>1</b> | <b>0</b> | <b>1</b> | <b>0,3%</b> |
| <b>10q LOH 21q EM</b>           | <b>0</b> | <b>0</b> | <b>1</b> | <b>1</b> | <b>0,3%</b> |
| <b>10q LOH 12p EM</b>           | <b>0</b> | <b>1</b> | <b>0</b> | <b>1</b> | <b>0,3%</b> |
